# Supplementary material for: Diffusion Mechanism Modeling of Metformin in Human Organic Cationic Amino Acid Transporter one and Functional Impact of S189L, R206C, and G401S Mutation
Source: PubMed Central journal article supplement (PMC7917475; doi:10.3389/fphar.2020.587590), 2021-02-09
Supplement: DataSheet1.pdf [file DataSheet1.pdf]

## Supporting material

# Diffusion Mechanism Modeling of metformin in Human Organic Cationic Amino Acid Transporter one and Functional Impact of S189L, R206C, and G401S Mutation.

Leydy Cano<sup>1</sup>, Alejandro Soto-Ospina<sup>1,2</sup>, Pedronel Araque<sup>2,5</sup>, Maria Antonieta Caro-Gomez<sup>1</sup>, Maria Victoria Parra-Marin<sup>3</sup>, Gabriel Bedoya<sup>1</sup> and Constanza Duque<sup>4\*</sup>

1. Universidad de Antioquia, Medellín, Colombia.
2. Universidad EIA, Envigado, Colombia.
3. Tecnológico de Antioquia, Medellín, Colombia.
4. Universidad Cooperativa de Colombia, Medellín Colombia.
5. Cecoltec, Medellín, Colombia

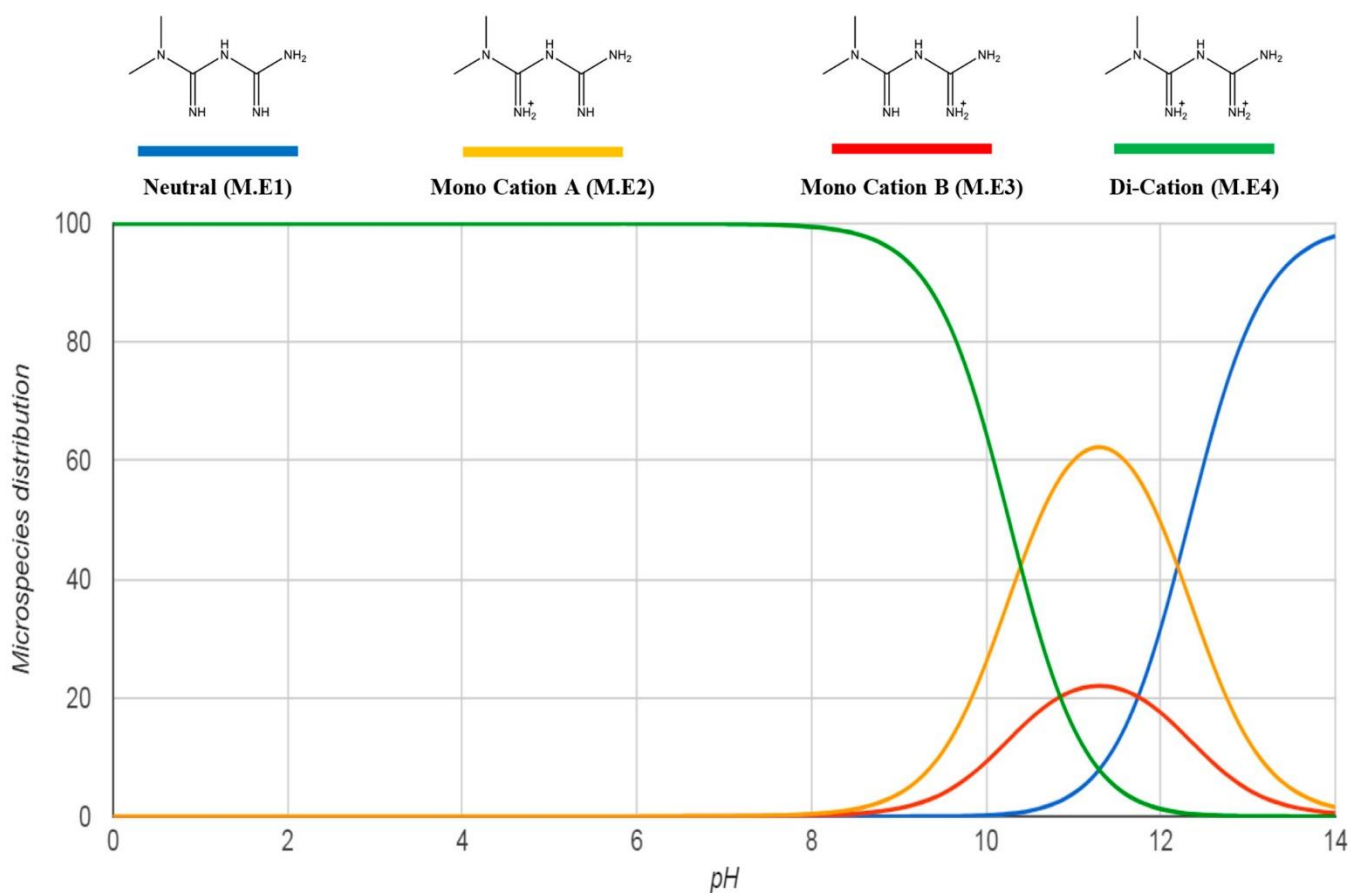

**Fig. S1** Metformin characterization for calculation of the  $\alpha$  (alpha) fractions

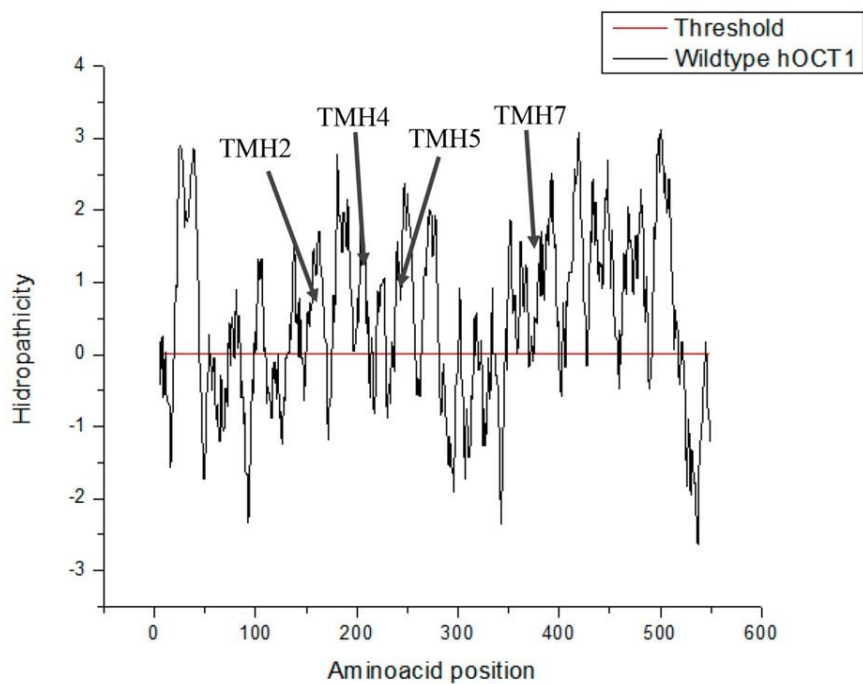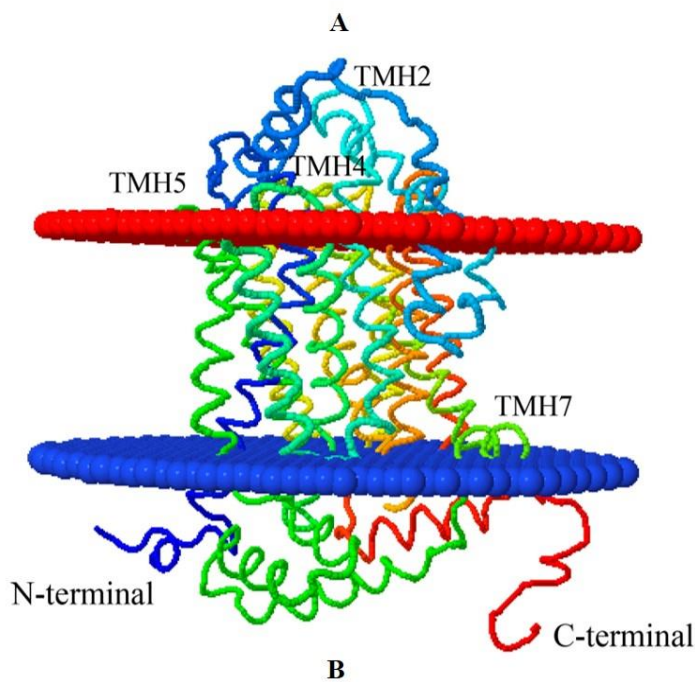

**Fig. S2** Characterization of Human Organic Cation Transporter hOCT1: A) Hydropathy index plot for hOCT1; B) Structure of transmembrane  $\alpha$ -helices involved in the passive diffusion of the metformin cation

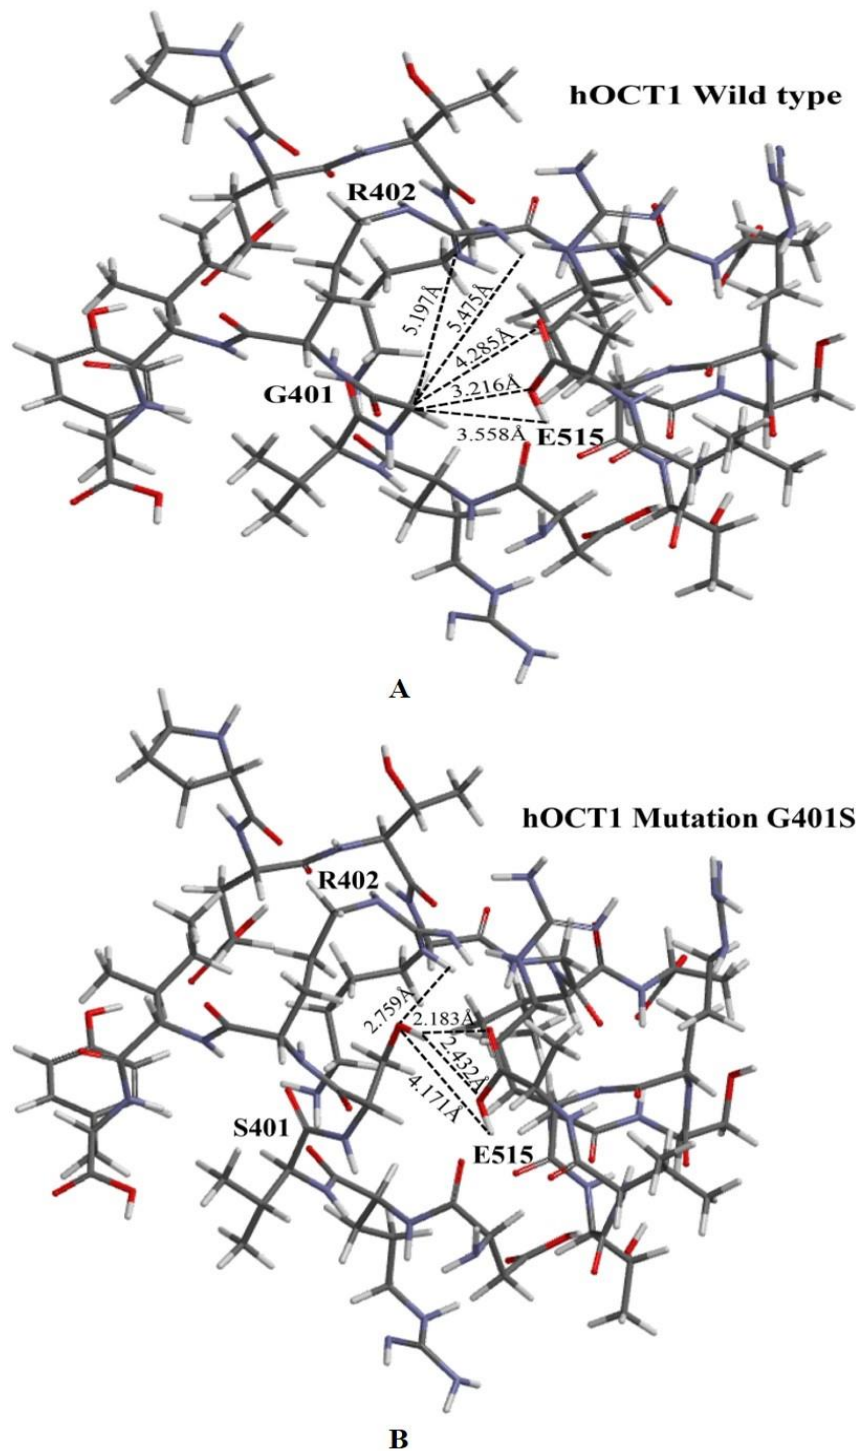

**Fig.S3.** Stick representation of amino acid structure in the proximity of position 401 in hOCT1: A) Bonding distances for the 401Gly structure; B) Bonding distances for the Ser401 structure

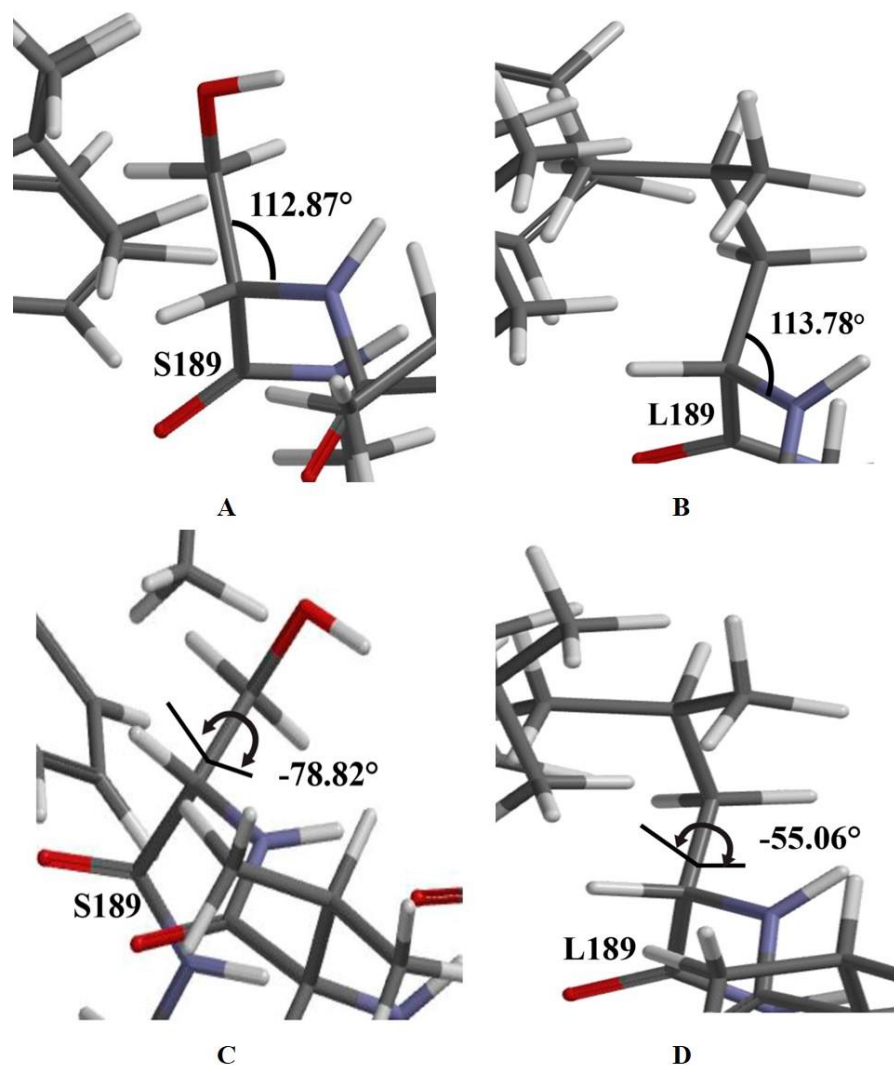

**Fig.S4.** Structural comparison of the region adjacent to position 189 of the hOCT1 channel: A) 3D visualization of the change in angle of the alpha carbon in the wild type Ser189 channel; B) 3D visualization of the change in angle of the alpha carbon in the wild type Leu189 mutated channel; C) 3D visualization of the change in the dihedral angle between alpha carbon planes in the wild type Ser189 channel; D) 3D visualization of the change in the dihedral angle of the alpha carbon planes Leu189 mutated channel
